1        **Mesenchymal stem cells restore local microenvironment and systemically**  
2                    **suppress leukemia via reprogramming macrophages**

3 Chengxiang Xia<sup>1,2,3,4,5†</sup>, Tongjie Wang<sup>1†</sup>, Hui Cheng<sup>6†</sup>, Yong Dong<sup>1,2</sup>, Qitong Weng<sup>1,2</sup>, Guohuan  
4 Sun<sup>6</sup>, Peiqing Zhou<sup>1,2</sup>, Kaitao Wang<sup>4</sup>, Xiaofei Liu<sup>1</sup>, Yang Geng<sup>1</sup>, Shihui Ma<sup>6</sup>, Sha Hao<sup>6</sup>, Ling Xu<sup>7</sup>,  
5 Yuxian Guan<sup>1</sup>, Juan Du<sup>1</sup>, Xin Du<sup>8,9</sup>, Yangqiu Li<sup>7</sup>, Xiaofan Zhu<sup>6</sup>, Yufang Shi<sup>10</sup>, Sheng Xu<sup>11</sup>, Demin  
6 Wang<sup>12,13</sup>, Tao Cheng<sup>6\*</sup>, Jinyong Wang<sup>1,2,3,4,5,6\*</sup>

7 <sup>1</sup>CAS Key Laboratory of Regenerative Biology, Guangzhou Institutes of Biomedicine and Health,  
8 Chinese Academy of Sciences, Guangzhou, China; <sup>2</sup>Guangzhou Regenerative Medicine and  
9 Health-Guangdong Laboratory (GRMH-GDL), Guangzhou, China; <sup>3</sup>Guangdong Provincial Key  
10 Laboratory of Stem cell and Regenerative Medicine, Guangzhou Institutes of Biomedicine and  
11 Health, Chinese Academy of Sciences, Guangzhou, China; <sup>4</sup>Joint School of Life Sciences,  
12 Guangzhou Institutes of Biomedicine and Health, Guangzhou Medical University, Guangzhou,  
13 China; <sup>5</sup>University of Chinese Academy of Sciences, Beijing, China; <sup>6</sup>State Key Laboratory of  
14 Experimental Hematology, Institute of Hematology and Blood Diseases Hospital, Chinese  
15 Academy of Medical Sciences and Peking Union Medical College, Tianjin, China; <sup>7</sup>Department  
16 of Hematology, First Affiliated Hospital; Institute of Hematology, School of Medicine; Key  
17 Laboratory for Regenerative Medicine of Ministry of Education; Jinan University, Guangzhou,  
18 China; <sup>8</sup>Department of Hematology, Guangdong General Hospital/Guangdong Academy of  
19 Medical Sciences, Guangzhou, China; <sup>9</sup>South China University of Technology, Guangzhou,  
20 China; <sup>10</sup>The First Affiliated Hospital of Soochow University, State Key Laboratory of Radiation  
21 Medicine and Protection, Institutes for Translational Medicine, Soochow University, Suzhou,  
22 China; <sup>11</sup>National Key Laboratory of Medical Immunology & Institute of Immunology, Second  
23 Military Medical University, Shanghai, China; <sup>12</sup>Blood Research Institute, Versiti, Milwaukee,

24 WI, USA; <sup>13</sup>Biomedical Research Center of South China, College of Life Sciences, Fujian Normal  
25 University, Fuzhou, China.

26 †Equal contributors.

27 \*Correspondences: [wang\\_jinyong@gibh.ac.cn](mailto:wang_jinyong@gibh.ac.cn) (J.W.), [chengtao@ihcams.ac.cn](mailto:chengtao@ihcams.ac.cn) (T.C.).

28 **Abstract**

29 Bone marrow (BM) mesenchymal stem cells (MSCs) are critical components of the BM  
30 microenvironment and play an essential role in supporting hematopoiesis. Dysfunction of MSCs  
31 is associated with the impaired BM microenvironment that promotes leukemia development.  
32 However, whether and how restoration of the impaired BM microenvironment can inhibit  
33 leukemia development remain unknown. Using an established leukemia model and high-  
34 throughput RNA-seq analysis, we discovered functional degeneration of MSCs during leukemia  
35 progression. Importantly, intra-BM instead of systemic transfusion of donor healthy MSCs  
36 restored the BM microenvironment, thus systemically changing cytokine expression patterns,  
37 improving normal hematopoiesis, reducing tumor burden, and ultimately prolonging survival of  
38 the leukemia-bearing mice. Donor MSC treatment restored the function of host MSCs and  
39 reprogrammed host macrophages to fulfill tissue-repair function. Transfusion of MSC-  
40 reprogrammed macrophages largely recapitulated the therapeutic effects of MSCs. Further, we  
41 found that donor MSCs reprogrammed macrophages to reduce leukemia burden through autocrine  
42 effects of IL-6. Taken together, our study reveals that donor MSCs reprogram host macrophages  
43 to restore the BM microenvironment and inhibit leukemia development, thus validating local MSC  
44 application as a potentially effective therapy for leukemia.

## 45 **Introduction**

46 BM MSCs are key components of the BM stromal microenvironment, regulating homeostasis of  
47 the stromal niche and hematopoiesis<sup>1</sup>. Accumulating evidences uncover that dysfunction of MSCs  
48 is associated with leukemia progression. Deletion of *Dicer1* gene in MSCs leads to impaired  
49 osteogenic differentiation, thrombopenia, and secondary tumorigenesis<sup>2</sup>. In myeloproliferative  
50 neoplasms, the leukemia cells reprogram MSCs to support proliferation of leukemia stem cells<sup>3</sup>.  
51 Ablation of MSC-derived osteoblasts impairs the homeostasis of hematopoietic stem cells (HSC)  
52 and accelerates leukemogenesis in chronic myeloid leukemia<sup>4</sup>. In a myelodysplastic/  
53 myeloproliferative neoplasms (MDS/MPN) model, *Ptpn11* mutation in MSCs hyperactivates HSC  
54 by secreting CCL3, systemically resulting in myeloid-biased proliferation and promoting leukemia  
55 progression<sup>5</sup>. Chromosomal abnormalities in MSCs occur in over 16% MDS/acute myeloid  
56 leukemia (AML) patients, which leads to a shorter survival<sup>6</sup>. MSCs of every MDS patient show  
57 features of stemness loss, ageing, and osteogenic differentiation defect, which results in  
58 insufficient hematopoiesis<sup>7</sup>. In a patient-derived xenograft (PDX) model, only co-transplantation  
59 of tumor cells and the same patient-derived MSCs successfully recapitulates the MDS phenotype,  
60 indicating that besides the loss of function of supporting hematopoiesis, MSCs in MDS patients  
61 may acquire a function of preferentially promoting tumorigenesis<sup>8</sup>. Despite these findings, the  
62 causal relationship between tumor cells and the BM microenvironment during leukemia  
63 development and progression remains elusive.

64 MSC therapy has been widely used in treating immune-related graft-vs-host disease (GVHD) and  
65 inflammation-related diseases<sup>9,10</sup>. Over the decades, a lot of evidence demonstrate that MSCs  
66 regulate innate and adaptive immune responses largely by secreting distinct sets of cytokines,  
67 growth factors and chemokines depending on different disease contexts<sup>11-15</sup>. Given the short

68 lifespan of donor MSCs after transfusion<sup>16</sup>, the underlying molecular and cellular mechanisms by  
69 which these cells produce therapeutic effects remain elusive. It is also completely unknown  
70 whether donor MSCs can restore the impaired BM microenvironment and consequently suppress  
71 disease progression in leukemia setting.

72 Macrophages are pivotal for maintenance of the tissue microenvironment, tissue repair and even  
73 the tumor microenvironment<sup>17-21</sup>. BM resident macrophages maintain the homeostasis of HSCs  
74 and loss of these macrophages leads to mobilization of HSCs into peripheral blood (PB)<sup>22</sup>. The  
75 functions of macrophages are plastic and can be reshaped by distinct sets of soluble factors. When  
76 performing tissue repair, macrophages highly express arginase 1 (*Arg1*)<sup>23</sup>, an enzyme that converts  
77 L-arginine to urea and L-ornithine. After co-culture with MSCs, macrophages can be polarized  
78 from pro-inflammation (M1) to anti-inflammation (M2) type, up-regulating IL-10 and CD206 and  
79 down-regulating IL-6 and IL-1 $\beta$ <sup>24</sup>. Upon stimulated by LPS or TNF- $\alpha$ , MSCs can cross-talk with  
80 lung macrophages and reprogram these macrophages to secrete IL-10 to alleviate sepsis<sup>25</sup>. Despite  
81 these knowledge, whether healthy MSCs can reprogram macrophages from leukemia-bearing host  
82 to repair the damaged BM microenvironment is not known.

83 Using the established mouse model mimicking chronic MPN/MDS diseases<sup>18,26-28</sup>, we discovered  
84 that the deteriorating BM microenvironment was associated with disease progression. Intra-BM  
85 instead of systemic transfusion of healthy MSCs restored the local BM microenvironment,  
86 improved thrombopoiesis, reduced tumor burden, and prolonged survival of leukemia-bearing  
87 mice. Mechanistically, we found that MSCs suppress leukemia development through resident  
88 macrophages and autocrine effect of IL-6. Our study demonstrates that intra-BM transfusion of  
89 MSCs can restore the local BM niche to systemically prevent leukemia progression and can be a  
90 novel therapy for leukemia.

91 **Results**

92 **Deterioration of BM MSCs accompanies the development of *Nras*-mutant-induced leukemia**

93 Mice carrying an endogenous mutant *Nras* allele develop myelodysplastic/myeloproliferative  
94 neoplasms (MDS/MPN)-like leukemia with a long latency<sup>18,26-28</sup>. Here we found the primary BM  
95 leukemia cells failed to accelerate the disease in the secondary recipient mice, implying a role of  
96 the BM microenvironment in disease etiology (Fig. S1). We hypothesized that the BM  
97 microenvironment is impaired by *Nras*-mutant leukemia cells, which in return impedes normal  
98 hematopoiesis and accelerates leukemia progression. Indeed, we observed quantitative decreases  
99 and functional degeneration of MSCs (Ter119<sup>-</sup>CD45<sup>-</sup>CD31<sup>-</sup>Sca1<sup>+</sup>CD51<sup>+</sup>CD146<sup>+</sup>) during disease  
100 development and progression (Fig. 1a-c). To further characterize the residual MSCs in mice with  
101 leukemia, we performed RNA-Seq analysis of the residual MSCs from leukemia-bearing mice at  
102 an early disease phase (CD11b<sup>+</sup>% in PB: 35%-45%). Consistent with the quantitative and  
103 functional reduction, the expression of the transcription factor *Gnl3*<sup>29</sup>, an indicator of MSC self-  
104 renewal, was significantly down-regulated in MSCs from leukemia-bearing mice relative to wild-  
105 type mice (Fig. 1d). The expression of *Nt5e* (CD73), *Thy1* (CD90), *Vcam1* (CD106), *Cd81*, *Sdc4*,  
106 *Itgb1* and *Anpep*<sup>29-31</sup>, encoding surface markers on three-lineage-potent MSCs but not on uni-  
107 lineage-primed MSCs, was markedly reduced in MSCs from leukemia-containing mice (padj <  
108 0.05, fold change > 1.6) (Fig. 1d). Furthermore, the expression of *Bgn*, *Bmp4*, *Colla1*, *Csf1*, *Dcn*,  
109 *Dkk2*, *Mmp13*, *Ogn*, *Wisp1*, and *Wisp2*<sup>29,32</sup>, pivotal for osteogenic differentiation, was markedly  
110 suppressed in the residual MSCs (padj < 0.05, fold change > 2) (Fig. 1e). MSCs fulfill their tissue-  
111 specific and condition-responsive regulatory functions through secreting distinct types of soluble  
112 factors<sup>33</sup>. Under leukemia condition, the residual MSCs indeed secreted much less soluble factors,  
113 including *Il6*, *Il11*, *Ccl2*, *Ccl7*, *Cxcl12*, *Cxcl13* and *Cxcl14* (padj < 0.05, fold change > 2),

114 compared to MSCs from normal wild-type mice (Fig. 1f). These molecules are pivotal for tissue  
115 repairing<sup>34-39</sup>. In addition, *Ccl5*, a chemokine involved in the pathogenesis of MPN<sup>40</sup> and the  
116 inhibition of thrombopoiesis<sup>41</sup>, was significantly up-regulated in the residual MSCs from  
117 leukemia-containing mice ( $\text{padj} < 0.05$ , fold change  $> 2$ ). Gene set enrichment analysis (GSEA)  
118 further revealed features of inflammation in the residual MSCs (Fig. 1g). Collectively, these results  
119 show that the MSCs dramatically deteriorate during the disease development and progression of  
120 *Nras*-mutation-caused leukemia.

### 121 **Intra-BM transfusion of healthy MSCs improves thrombopoiesis, reduces tumor burden and** 122 **improves survival of the leukemia-bearing mice**

123 We hypothesized that restoration of the impaired BM microenvironment in leukemia-bearing mice  
124 might suppress/delay the disease progression. To test this hypothesis, we attempted healthy MSC  
125 treatment using GFP-tagged MSCs isolated from the tibias and femurs of healthy mice as  
126 previously reported<sup>42</sup>. The isolated primary MSCs were expanded shortly *in vitro* to passage two  
127 (P2) and cryopreserved. For MSC treatment, the cryopreserved P2 MSCs were recovered and  
128 cultured for five days, phenotypically identified ( $\text{CD45}^- \text{Ter119}^- \text{CD31}^-$   
129  $\text{CD51}^+ \text{CD105}^+ \text{LepR}^+ \text{PDGFR}\alpha^+ \text{PDGFR}\beta^+ \text{Sca1}^+$ ) (Fig. S2), and suspended in DPBS ( $2.5 \times$   
130  $10^7/\text{ml}$ ) for transfusion. Initially, we adopted a direct delivery procedure by injecting donor  
131 MSCs every two weeks either via tail vein (dose:  $0.5 \times 10^6/\text{mouse}$ ) (Fig. S3a) or retro-orbital  
132 (dose:  $0.5 \times 10^6/\text{mouse}$ ) transfusion (Fig. S3b) into the leukemia-bearing mice at a late disease  
133 phase ( $\text{CD11b}^+$  cells  $> 60\%$  in PB). However, these delivery approaches failed to produce  
134 therapeutic effects. *In vitro* cultured MSCs lose their natural homing feature<sup>43</sup>. Thus, we attempted  
135 intra-BM transfusion to overcome the homing defect caused by *in vitro* culture. A  $2.5 \times 10^7$   
136 MSCs/kg dose in 20  $\mu\text{L}$  DPBS was injected into the tibia cavities of leukemia-bearing mice with

137 two-week intervals for up to 16 weeks (Fig. 2a). Strikingly, the tumor burden continuously  
138 decreased during MSC treatment (Fig. 2b). Consequently, the survival of treated leukemia-bearing  
139 mice was significantly prolonged (Untreated: 261.5 days, MSC-treated: >360 days,  $p < 0.001$ )  
140 (Fig. 2c). Therefore, intra-BM transfusion of healthy donor MSCs improves the survival of  
141 leukemia-bearing mice.

### 142 **MSC-treatment systemically re-balances myelopoiesis and activates megakaryopoiesis**

143 We next investigated the underlying mechanisms associated with the systemically decreased tumor  
144 burden. We found that the hematopoiesis in the MSC-treated leukemia-bearing mice was re-  
145 balanced, demonstrated by significant decreases of white blood cells (Untreated vs MSC-treated:  
146 23.04 vs 8.876,  $p = 0.009$ ), and significant elevation of platelets (Untreated vs MSC-treated: 2.64  
147 vs 6.01,  $p = 0.004$ ) (Fig. 2d) in PB. On the contrary, the PBS-treated leukemia-bearing mice  
148 exhibited neither improved hematopoiesis nor prolonged survivals (Fig. S4). High GM-CSF levels  
149 in serum are associated with the tumor burdens of CMML in patients<sup>44</sup> and mouse models<sup>26</sup>. We  
150 analyzed the GM-CSF levels in serum of leukemia-bearing mice with or without MSC-treatment.  
151 As expected, the GM-CSF levels in MSC-treated leukemia-bearing mice were significantly  
152 decreased (> 7 folds) ( $p < 0.001$ ) (Fig. 2e). IL-6 promotes thrombopoiesis by increasing systemic  
153 TPO levels<sup>45</sup>. Consistently, the MSC-treated leukemia-bearing mice exhibited elevated IL-6 (> 25  
154 folds) and TPO (> 2 folds) levels (Fig. 2f) in PB serum. Collectively, these results indicate that  
155 intra-BM transfusion of healthy donor MSCs systemically improves hematopoiesis and prolongs  
156 the survival of leukemia-bearing mice.

157 To further investigate the systemic effects of the local MSC-treatment on hematopoiesis in  
158 leukemia-bearing mice, we analyzed the ratios of myeloid progenitor subpopulations in MSC-  
159 treated leukemia-bearing mice. Consistent with the elevated platelet levels and reduced myeloid



160 cells in PB, the MSC-treated leukemia-bearing mice showed increased proportions of  
161 megakaryocyte-erythroid progenitors (MEP) ( $> 1.6$  folds) ( $p < 0.001$ ) and decreased ratios of  
162 granulocyte-macrophage progenitors (GMP) ( $> 1.5$  folds) ( $p < 0.001$ ) in both injected and non-  
163 injected sites than those sites in PBS-treated leukemia-bearing mice (Fig. 3a-b). In addition, we  
164 observed increased ( $> 1.3$  folds) ratios of mature megakaryocytes ( $\geq 8N$ ) in both injected and non-  
165 injected sites in MSC-treated leukemia-bearing mice (Fig. 3c-d) in comparison with PBS-treated  
166 leukemia-bearing control mice ( $p < 0.001$ ). Thus, these data demonstrate that MSC-treatment  
167 systemically re-balances myelopoiesis and activates megakaryopoiesis in leukemia-bearing mice.

### 168 **Recovered host MSCs are functional as healthy counterparts**

169 To investigate whether the improved hematopoiesis is associated with restoration of the BM  
170 microenvironment, we analyzed the MSC-treated tibias eight weeks after MSC treatment.  
171 Interestingly, host MSC (GFP negative) were partially recovered (Fig. 4a-b), but restricted to the  
172 locally treated tibias (Fig. S5). Functionally, the recovered host MSCs formed markedly more  
173 CFU-F colonies than the residual MSCs from untreated leukemia-bearing mice ( $> 3.8$  folds) ( $p <$   
174  $0.001$ ) (Fig. 4c and Fig. S6). To characterize the recovered MSCs at the transcriptome level, we  
175 sorted the recovered MSCs for RNA-Seq analysis. The expression of chemokines, including *Ccl2*,  
176 *Ccl7*, *Ccl19*, *Cxcl12*, *Cxcl13*, and *Cxcl14*, was restored in the recovered MSCs compared to that  
177 in MSCs from untreated leukemia-bearing control mice ( $\text{padj} < 0.05$ , fold change  $> 2$ ) ( $p < 0.05$ )  
178 (Fig. 4d and Fig. S7). Unsupervised hierarchical clustering analysis showed that the recovered  
179 MSCs clustered closer to healthy MSCs (Fig. 4e). Therefore, donor MSC-treatment results in local  
180 functional restoration of host MSCs.

### 181 **The donor MSCs reprogram macrophages to execute tissue-repair function**

182 We further investigated the cellular mechanism underlying the restored BM microenvironment  
183 mediated by donor MSCs under leukemia condition. BM macrophages play a pivotal role in  
184 maintaining the BM niche<sup>17</sup>. To study whether donor MSCs reprogram BM macrophages, we  
185 performed co-culture assay of healthy MSCs with BM macrophages (L-Mac) sorted from the  
186 leukemia-bearing mice *in vitro* for twelve hours and re-sorted the macrophages (E-Mac) for RNA-  
187 Seq analysis. GSEA illustrated that angiogenesis-related genes, including *Vegfa*, *Hif1a*, *Serpine1*,  
188 *Eng* and *Thbs1*<sup>46</sup> (Fig. S8a), were enriched among the differentially expressed genes in E-Mac  
189 (Fig. 5a). Genes associated with cell migration, including *Sirpa* and *Ccl5*<sup>47,48</sup>, were also enriched  
190 in E-Mac (Fig. 5b and Fig. S8b). Further, gene-ontology analysis demonstrated features of positive  
191 regulation of cell migration and angiogenesis in E-Mac (Fig. 5c). An elevated expression of genes  
192 encoding soluble factors involving in tissue repairing<sup>49,50</sup>, including *Ccr2*, *Ccl3*, *Ccl5* and *Il6*, was  
193 also observed in E-Mac (Fig. 5d). RNA-Seq analysis showed that the expression of arginase 1  
194 (*Arg1*), an indicator of tissue repair function<sup>23</sup>, was dramatically up-regulated over thousand folds  
195 in E-Mac (Fig. 5e) after direct co-culture with MSCs *in vitro*. However, the *Arg1* expression in  
196 macrophages after transwell co-culture was barely elevated (Fig. 5e), indicating that direct cell-  
197 cell interaction instead of MSC-secreted soluble factors is essential for the functional  
198 reprogramming. Consistent with the observation *in vitro*, the expression of *Arg1* was also  
199 significantly increased in BM macrophages directly isolated from MSC-treated leukemia-bearing  
200 mice (Fig. 5f). Collectively, these results indicate that the donor MSCs reprogram BM  
201 macrophages from leukemia-bearing mice to executing tissue-repair function.

## 202 **The E-Mac treatment largely recapitulates the therapeutic effects of MSC treatment**

203 Given the short lifespan of donor MSCs *in vivo*<sup>16</sup>, we speculated that MSCs mediate the restoration  
204 of the BM microenvironment of leukemia-bearing mice by reprogramming macrophages. We

205 isolated macrophages from leukemia-bearing mice and co-cultured them with healthy MSCs for  
206 12h, and then transplanted these E-Mac back into leukemia-bearing mice by intra-BM injection  
207 (Fig. 6a). We indeed found that the thrombopoiesis was significantly improved (> 6 folds) after E-  
208 Mac treatment ( $p < 0.001$ ) (Fig. 6b-c). Host MSCs were also significantly increased (> 3 folds) in  
209 E-Mac-treated leukemia-bearing mice ( $p < 0.001$ ) (Fig. 6d-e). Consistent with the MSC treatment,  
210 we also observed increased ratios of mature megakaryocytes ( $p < 0.001$ ) (Fig. 6f-g) and alleviated  
211 tumor burden (CD11b<sup>+</sup>) (Fig. S9) in E-Mac-treated leukemia-bearing mice. Collectively, these  
212 results demonstrate that MSC-reprogrammed macrophages largely recapitulate the therapeutic  
213 effects of MSCs.

#### 214 **MSCs reprogram macrophages and reduce leukemia burden through IL-6**

215 Residual MSCs in leukemia-bearing mice lost abilities to secrete IL-6 (Fig. 1f). IL-6 is critical for  
216 maintaining the stemness and function of MSCs<sup>51</sup>. The recovered host MSCs after donor MSC-  
217 treatment expressed comparable *Il6* mRNA as healthy MSCs (Fig. 4d). Consistently, BM plasma  
218 IL-6 levels in MSC-treated leukemia-bearing mice were significantly elevated (> 3 folds) and were  
219 comparable to those in healthy mice ( $p < 0.001$ ) (Fig. 7a). To investigate the role of IL-6 in MSC-  
220 mediated therapeutic effects, we directly injected IL-6 proteins (40  $\mu\text{g}/\text{kg}$ ) into leukemia-bearing  
221 mice. However, systemic IL-6 transfusion failed to suppress leukemia (Fig. S10). We speculated  
222 that IL-6 might function as an autocrine factor for MSCs to reprogram macrophages in leukemia-  
223 bearing mice. *In vitro* co-culture assay showed that *Il6*<sup>-/-</sup> MSCs compromised their ability to induce  
224 *Arg1* expression in macrophages derived from leukemia-bearing mice (Fig. 7b). In addition, intra-  
225 BM injection of *Il6*<sup>-/-</sup> MSCs neither improved thrombopoiesis nor reduced tumor burden in  
226 leukemia-bearing mice (Fig. 7c-e). Furthermore, *Il6*<sup>-/-</sup> MSCs failed to reprogram macrophages in  
227 leukemia-bearing mice *in vivo* (Fig. 7f). Taken together, these results demonstrate that autocrine

228 IL-6 is essential for MSC-mediated reprogramming of macrophages and reduction of tumor burden  
229 in leukemia-bearing mice.

## 230 **Discussion**

231 Deteriorating BM microenvironment accompanies chronic leukemia progression. Here we unravel  
232 a *de novo* approach of reverting the impaired BM microenvironment by intra-BM injection of  
233 donor MSCs. Upon injection, the donor MSCs quickly reprogrammed local host BM macrophages  
234 to repair the niche, thus improving normal hematopoiesis and suppressing leukemia development.  
235 These effects of donor MSCs depend on the autocrine production of IL-6. Our studies reveal *de*  
236 *novo* mechanisms underlying MSC-mediated local BM microenvironment restoration that  
237 systemically suppress leukemia development.

238 Given the short-term lifespan of the exogenous MSC *in vivo*, it is surprising that local injection of  
239 donor MSCs results in long-term improvement of thrombopoiesis and reduction of tumor burden.  
240 Following injection, exogenous donor MSCs immediately reprogram host resident macrophages  
241 that further organize the overhaul of local BM microenvironment, including restoring the functions  
242 of host MSCs. There are a lot of evidence supporting the pivotal roles of macrophages in tissue  
243 repair<sup>49,52</sup>. Donor MSCs can transiently release a key wave of tissue-repair factors, such as IL-6<sup>34</sup>,  
244 CCL7<sup>39</sup> and CXCL12<sup>36</sup>, and reprogram host macrophages, subsequently resulting in the recovery  
245 of host MSCs. Recovered host MSCs further secreted much higher level of CCL2, CCL7 and  
246 CXCL12 that can further facilitate BM niche repair. Donor MSCs could also directly modulate the  
247 other niche cells, in addition to macrophages, to participate in BM niche repair<sup>11</sup>. Consequently,  
248 the restored local BM microenvironment outputs abundant hematopoiesis-improving cytokines,  
249 including IL-6<sup>45</sup>, and reduces tumor-growth-stimulating cytokines, such as GM-CSF<sup>26,44</sup>. Thus,

250 despite the short life-span, donor MSCs provide long-term thrombopoiesis improvement and  
251 tumor burden reduction through the stepwise microenvironment restoration.

252 Of note, IL-6 deficiency in MSCs markedly compromised the abilities of these cells to reprogram  
253 host resident macrophage. Transwell co-culture study has shown that direct interaction between  
254 MSCs and macrophages is required for reprogramming host macrophages. Both autocrine  
255 production of IL-6 and reprogramming host macrophages by MSCs are required for MSC-  
256 mediated microenvironment restoration and leukemia inhibition. However, it is not clear how  
257 autocrine IL-6 controls the function of MSCs and how MSCs directly reprogram macrophages.  
258 The underlying molecular mechanisms warrant further investigation.

259 MSC treatment inhibits leukemia development in the *Nras*-mutation-induced MPN/MDS-like  
260 disease model. We also attempted to broaden MSC treatment for acute leukemia in the MLL-AF9-  
261 initiated model (Fig. S11a), in which impaired MSCs results in the reduction of osteogenesis and  
262 CXCL12 production<sup>53</sup>. Despite a mild elevation of platelet level, the intra-BM transfusion of donor  
263 MSCs failed to significantly improve normal hematopoiesis or suppress acute leukemia  
264 development (Fig. S11b-h). Therefore, the intra-BM MSC treatment might be beneficial for  
265 MPN/MDS leukemias, such as JMML and CMML, but insufficient for suppressing acute  
266 leukemia. Although MSC application could be an effective therapeutic regimen for patients with  
267 MPN/MDS-subtype leukemia, combination therapy of conventional approaches with local MSC  
268 transfusion might be required to achieve therapeutic outcomes for acute leukemia with impaired  
269 BM microenvironment.

## 270 **Methods**

271 **Mice.** All mouse strains were maintained on C57BL/6 genetic background. Mice expressing the  
272 conditional oncogenic *Nras*G12D mutation (a gift from Dr. Jing Zhang lab at University of

273 Wisconsin-Madison, Wisconsin, USA) were crossed to Vav-Cre mice to generate *LSL Nras/+*;  
274 *Vav-Cre* compound mice (NV mice). Genotyping of the adult mice was performed as described  
275 previously<sup>26</sup>. Vav-Cre strain (CD45.2), wild-type CD45.2, CD45.1 strain (C57BL/6) and *Il6* knock  
276 out strain (*Il6*<sup>-/-</sup>, C57BL/6) were purchased from Jackson lab. GFP strain (CD45.2) was gifted by  
277 Guangdong Laboratory Animals Monitoring Institute. *MLL-AF9* AML model mice were  
278 maintained a specific pathogen-free animal facility at the State Key Laboratory of Experimental  
279 Hematology. All mice were maintained within the SPF grade animal facility of Guangzhou  
280 Institution of Biomedicine and Health, Chinese Academy of Science (GIBH, CAS, China). All  
281 animal experiments were approved by the Institutional Animal Care and Use Committee of  
282 Guangzhou Institutes of Biomedicine and Health (IACUC-GIBH).

283 **NrasG12D leukemia model.** White blood cells (CD45.2<sup>+</sup>, 0.3 million) after depletion of stromal  
284 cells from NrasG12D compound mice (*LSL Nras/+*; *Vav-Cre*) or control mice (CD45.2 strain)  
285 were sorted and transplanted into sublethally (6.5 Gy, RS2000, Rad Source Inc) irradiated CD45.1  
286 recipient by retro-orbital intravenous injection. Mice were fed with trimethoprim-  
287 sulfamethoxazole-treated water for two weeks to prevent infection. Hematopoietic lineages in PB  
288 were assessed monthly by flow cytometry. During the development of NrasG12D-induced  
289 leukemia, the CD11b<sup>+</sup> percentage in PB indicated the tumor burden (CD11b<sup>+</sup>%).

290 **MLL-AF9 AML mouse model.** We used a non-irradiated acute myeloid leukemia mouse model  
291 described previously<sup>54</sup>.

292 **Flow cytometry analysis.** Antibodies for hematopoietic lineage analysis: FITC-TER-119 (TER-  
293 119), PerCP-Cyanine5.5-CD45.2 (104), APC-Thy1.2 (53-2.1), APC-CD3e (145-2C11), PE-CD19  
294 (1D3), PE-Cy7-CD11b (M1/70), APC-eFluor®780-Gr-1 (RB6-8C5), FITC-CD41 (MWRReg30),

295 PE-CD61 (2C9.G3) and APC-eFluor®780-F4/80 (BM8) antibodies were purchased from  
296 eBiosciences. DAPI was used to exclude dead cells.

297 For MSC analysis, BMNC were stained with the following antibodies: APC-Ter119 (TER-119),  
298 APC-CD45 (30-F11), PE-Cy7-CD31 (WM-59), APC-eFluor®780-Sca1 (D7), PE-CD51 (RMV-  
299 7), and PerCP-Cyanine5.5-CD146 (ME-9F1) were purchased from eBiosciences or Biolegend.  
300 DAPI was used to exclude dead cells.

301 For myeloid progenitors staining, BM cells were stained with the following antibodies: CD2  
302 (RM2-5), CD3e (145-2C11), CD4 (RM4-5), CD8a (53-6.7), Ter119 (TER-119), CD11b (M1/70),  
303 B220 (6B2), Gr1 (RB6-8C5), IL-7R (A7R34), Sca1 (E13-161.7), c-kit (2B8), CD34 (RAM34),  
304 and CD16/32 (93). DAPI was used to exclude dead cells.

305 For megakaryocyte maturation detection, BM cells were stained with labeled with CD41-FITC  
306 (MWReg30). Then cells were fixed using cold 70% ethanol. After washing, the fixed cells were  
307 resuspended in propidium iodide.

308 For platelet staining and counting, 5 µL fresh whole blood was collected. Whole blood sample was  
309 blocked with anti-mouse CD16/32, then was stained with anti-mouse CD41-FITC and anti-mouse  
310 CD61-PE at room temperature for 20 mins. Then 1 mL of cold 1% PFA solution and 50 µL  
311 absolute counting beads (C36950, Invitrogen) were added to each sample. The sample was fixed  
312 on ice for at least 30 mins.

313 The stained cells were analyzed on LSR Fortessa (BD Bioscience), then the data were analyzed  
314 using Flowjo software (FlowJo).

315 **Preparation of BMNC.** Mice were sacrificed, and BM cells were isolated by flushing out the  
316 tibias and femurs using DPBS containing 2% FBS. The compact bones were dissected into ~2 mm  
317 fragments and transferred with 5ml of 1 mg/ml collagenase II solution into a 50 ml tube. The tubes

318 were incubated in a shaker (< 110 rpm) at 37°C for 1-2 hours. BMNC from BM cells and compact  
319 bones were mixed and filtered through a 70 µm cell strainer (BD Falcon) to obtain a single-cell  
320 suspension.

321 **MSC sorting.** BMNC mixtures of BM and compact bones from the control mice (age-matched  
322 wild-type, CD11b<sup>+</sup>% in PB = 10-15%), leukemia-bearing mice (CD11b<sup>+</sup>% in PB = 35%-45%) and  
323 leukemia-bearing mice eight weeks post-treatment with GFP<sup>+</sup> MSCs were isolated as previously  
324 described. After lysis of red blood cells, BMNC were blocked by Fc blocker, and incubated with  
325 biotin-conjugated anti-CD45 antibody and enriched by streptavidin magnetic beads (Miltenyi  
326 Biotec). The enriched CD45<sup>-</sup> cells were stained with the following antibodies: APC-Ter119 (TER-  
327 119), APC-CD45 (30-F11), streptavidin-APC, PE-Cy7-CD31 (WM-59), APC-eFluor®780-Sca1  
328 (D7), PE-CD51 (RMV-7) were purchased from eBiosciences. DAPI was used to exclude dead  
329 cells. MSCs were sorted by the gating strategy defining as GFP<sup>-</sup>Ter119<sup>-</sup>CD45<sup>-</sup>CD31<sup>-</sup>Sca1<sup>+</sup>CD51<sup>+</sup>  
330 using AriaII (BD Bioscience) and subsequently prepared for RNA-Seq.

331 **Mouse colony-forming unit-fibroblast (CFU-F) assay.** For analyzing the quantity of functional  
332 MSCs, BMNC equivalent to 100 MSCs from each mouse were used as cell input for individual  
333 wells (six-well plate). BMNC were suspended into 2 ml of mouse complete MesenCult™ medium  
334 (Catalog 05513, StemCell Technology), then seeded into the individual wells. BMNC were  
335 incubated at 37°C with 5% CO<sub>2</sub> in a humidified chamber. Half-medium change was performed on  
336 day 7. After 14 days, the wells were washed once with DPBS and fixed by ice-cold ethanol, and  
337 then stained with giemsa stain at RT. After washing, colonies with more than 20 spindle-shaped  
338 cells per colony were counted. Three replicates of each sample were performed.

339 **Isolation and expansion of mouse MSCs.** MSCs were isolated from cell mixture of compact  
340 bones and BM cells of 3-4 weeks old healthy GFP mice (n = 100) or *Il6*<sup>-/-</sup> mice, as previously



341 reported with minor modifications<sup>42</sup>. Briefly, the BM cavities were flushed in order to thoroughly  
342 deplete hematopoietic cells. The compact bones were dissected into ~2 mm fragments and  
343 transferred with 5ml of 1 mg/ml collagenase II solution into a 50 ml tube. The tubes were incubated  
344 in a shaker (< 110 rpm) at 37°C for 1-2 hours. The fragments were washed three times and  
345 cultivated in complete MSC culture medium ( $\alpha$ -MEM (Gibco) supplemented with 10% FBS  
346 (Gibco) and 1% penicillin/streptomycin (Invitrogen)) in a 6 cm dish. Besides, MSCs from the BM  
347 cells were sorted ( $\text{Ter119}^- \text{CD45}^- \text{CD31}^- \text{Sca1}^+ \text{CD51}^+ \text{CD146}^+$ ) directly into MSC culture medium.  
348 These two sources of MSCs from compact bones and BM cells were mixed for further isolation  
349 and expansion. The bone fragments were removed, and culture medium was replaced after three  
350 times' washing on the third day. After culture for five days, the adherent cells were harvested by  
351 0.25% trypsin's digestion and passaged. The culture medium was changed every 48 hours and  
352 passaged at a split ratio of 1:3 every 3-4 days. The expanded MSCs (Passage 2) were cryopreserved  
353 with 90% DMSO and 10% FBS in liquid nitrogen for transfusion. The cryopreserved P2 MSCs  
354 were recovered and cultured for 4-5 days, phenotypically identified, and collected in DPBS ( $2.5 \times$   
355  $10^7$ /ml) for transfusion.

356 **RNA-Seq and data analysis.** For MSC library preparation, MSCs were sorted from wild type or  
357 leukemia-bearing mice, and recovered MSC were sorted from leukemia-bearing mice 8 weeks post  
358 treatment with GFP<sup>+</sup> donor MSCs. MSCs were sorted from two mice of each group. 1000 target  
359 cells per sample were sorted into 500  $\mu$ l DPBS-BSA buffer (0.5%BSA) using 1.5ml EP tube and  
360 transferred into 250  $\mu$ l tube to spin down with 500 g. The cDNA of sorted 1000-cell aliquots were  
361 generated and amplified as described previously<sup>55</sup>. The qualities of the amplified cDNA were  
362 examined by Q-PCR analysis of housekeeping genes (*B2m*, *Actb*, *Gapdh*, *Ecfla1*). Samples passed

363 quality control were used for sequencing library preparation by illumina Nextera XT DNA Sample  
364 Preparation Kit (FC-131-1096).

365 For macrophages (*in vivo*) library preparation, macrophages were sorted from BM of leukemia-  
366 bearing mice before or after MSC treatment (12 hours post MSC treatment). Macrophages were  
367 also sorted after 12 hours of co-culture with MSCs.  $1 \times 10^5$  target cells per sample were sorted,  
368 and total RNA was extracted using the RNeasy micro kit with on-column DNase treatment  
369 (Qiagen, 74004) according to manufacture's protocol. cDNA library was constructed using  
370 VAHTSTM mRNA-seq V3 Library Prep Kit for Illumina (Vazyme, NR611) according to  
371 manufacture's protocol. The qualities of the cDNA were examined by qPCR analysis of  
372 housekeeping genes (*B2m*, *Actb*, *Gapdh*, *Ecf1a1*). Samples that passed quality control were used  
373 for sequencing.

374 For data analysis, all libraries were sequenced by illumina sequencers NextSeq 500. The fastq files  
375 of sequencing raw data samples were generated using illumina bcl2fastq software (version:  
376 2.16.0.10) and were uploaded to Gene Expression Omnibus public database (GSE 125029). Raw  
377 reads were aligned to mouse genome (mm10) by HISAT2<sup>56</sup> (version: 2.1.0) as reported. And raw  
378 counts were calculated by featureCounts of subread<sup>57</sup> (version 1.6.0). Differential gene expression  
379 analysis was performed by DESeq2<sup>58</sup> (R package version: 1.18.1). Unsupervised clustering  
380 analysis was performed using facotextra (R package, version: 1.0.5). Heatmaps were plotted  
381 using gplots (R package, version 3.01). GSEA was performed as described<sup>59</sup>, and gene-ontology  
382 (GO)-enrichment analysis were performed by clusterProfiler<sup>60</sup> (R package, version: 3.6.0). MSC  
383 stemness related genes and MSC osteogenesis related genes for heatmaps were from literatures as  
384 follows: MSC stemness-related genes<sup>29-31</sup> and MSC osteogenesis-related genes<sup>29,32</sup>. The gene sets  
385 for GSEA were from literatures as follows: angiogenesis related genes in macrophages<sup>46</sup>, cell

386 migration related genes in macrophages (from MSigDB genesets), and secreted factors by  
387 macrophages<sup>61,62</sup>.

388 **MSC treatment for leukemia-bearing mice.** For MSC transfusion, multiple approaches  
389 including retro-orbital, tail intravenous and local intra-BM transfusion were applied  
390 independently. For tail vein transfusion, each leukemia-bearing mouse was injected with  $2.5 \times$   
391  $10^7$  MSCs/kg (Passage 2) in 100  $\mu$ l DPBS by tail vein transfusion. For retro-orbital transfusion,  
392 each leukemia-bearing mouse was injected with  $2.5 \times 10^7$  MSCs/kg (Passage 2) in 200  $\mu$ l DPBS  
393 by retro-orbital transfusion. For local intra-BM transfusion, tibia of each leukemia-bearing mouse  
394 was injected with  $2.5 \times 10^7$  MSCs/kg (Passage 2) in 20  $\mu$ l DPBS by local intra-BM transfusion.  
395 MSCs were injected once every two weeks and continued in a time window of 16 weeks. Every  
396 tibia was treated once per month by switching the injection site every other dose. The control mice  
397 were injected with DPBS following the same treatment procedure as MSCs. Analysis of platelets  
398 and CD11b<sup>+</sup> cells in PB was performed monthly.

399 **GFP-MSC and BM macrophage co-culture assay.** Short-term co-culture assay was performed,  
400 with each well containing:  $1 \times 10^5$  GFP-MSCs (passage 2; healthy MSCs were isolated from  
401 GFP mice, *Il6*<sup>-/-</sup> MSCs were isolated from *Il6*<sup>-/-</sup> mice) and  $2 \times 10^6$  CD11b<sup>+</sup> leukemia cells sorted  
402 from leukemia-bearing mice in 2 mL culture medium of  $\alpha$ -MEM, 10% FBS and 50 ng/ml SCF.  
403 MSCs and CD11b<sup>+</sup> leukemia cells were incubated either by direct-contact culture or transwell  
404 culture for 12 hours at 37°C under 5% CO<sub>2</sub> in a humidified incubator. MSC-reprogrammed  
405 macrophages from leukemia-bearing mice (CD11b<sup>+</sup>F4/80<sup>+</sup>) were sorted for detecting the gene  
406 expression by Q-PCR.

407 **Treatment for leukemia-bearing mice with MSC-reprogrammed macrophages.**  $1 \times 10^5$   
408 MSCs were seeded into each well of six-well plates. CD11b<sup>+</sup> leukemia cells were enriched from

409 BM of leukemia-bearing mice with severe tumor burden ( $CD11b^{+}\%$  in PB  $> 60\%$ ). Then  $2 \times 10^6$   
410  $CD11b^{+}$  leukemia cells were directly co-cultured with MSCs. After 12 hours, macrophages were  
411 sorted for transfusion. Leukemia-bearing mice with severe tumor burden were treated by intra-BM  
412 transfusion of PBS or MSC-reprogrammed macrophages from leukemia-bearing mice (E-Mac). A  
413 dose of 1 million macrophages/mouse in 20  $\mu$ l PBS were delivered into the tibia cavity using 29-  
414 gauge needle. Every tibia was treated once per two weeks by switching the injection site every  
415 other dose. Analysis of platelets and  $CD11b^{+}$  cells in PB was performed monthly.

416 **Complete blood count (CBC).** For mouse samples, 100  $\mu$ l PB from each mouse was collected  
417 into 1.5 ml anticoagulation tube and diluted with the same volume of PBS, then performed  
418 complete blood count by automatic blood analyzer (Abbott, CD3700SL).

419 **Enzyme-linked immunosorbent assay (ELISA) assay.** For mouse samples, serum was collected  
420 from PB of control mice and leukemia-bearing mice; and BM plasma samples were collected from  
421 tibias and femurs of control mice and leukemia-bearing mice by flushing out the BM using 1-2 ml  
422 PBS. The supernatants were collected for ELISA after centrifugation. The concentration of  
423 cytokines, mouse IL-6 (CME0006-96) and mouse GM-CSF (CME0026-96), were measured using  
424 ELISA kits (Beijing 4A Biotech Corporation, China) according to the manufacture's instruction.  
425 The concentration of cytokine, mouse TPO (BEK-2096-1P), was measured using ELISA kits  
426 (Biosensis) according to the manufacture's instruction.

427 **mIL-6 treatment for leukemia-bearing mice.** A dose of 40  $\mu$ g/kg mIL-6 was injected into each  
428 leukemia-bearing mouse by intraperitoneal injection. mIL-6 was injected once every day and  
429 continued in a time window of 4 weeks. Analysis of tumor burden ( $CD11b^{+}$  cells) in PB was  
430 performed every two weeks.

431 **Quantitative real-time PCR.** For analysis of mRNA expression levels of related genes in MSCs  
432 and CD11b<sup>+</sup> leukemia cells from the co-culture assay,  $1 \times 10^5$  target cells of each sample were  
433 sorted by flow cytometry using Aria II. Total RNA was extracted using the RNeasy Micro Kit (Cat  
434 NO. 74004, QIAGEN). On-column DNase digestion of the samples was performed following  
435 manufacturer's instruction. First strand cDNA was synthesized from 100 ng of total RNA in 20  
436  $\mu$ l final volume, using the ReverTra Ace qPCR RT Master Mix kit (FSQ-301, TOYOBO)  
437 according to the manufacturer's instructions. Real-time quantitative PCR assays were carried out  
438 in a BioRad CFX96 Real-Time PCR Detection System instrument (Bio-Rad) using standard PCR  
439 conditions. Triplicates of all reactions were performed. GAPDH gene was used as a reference for  
440 differential expression comparison. The primer sequences of all related genes are shown in Table  
441 S1.

442 **Statistical analysis.** The data were represented as mean  $\pm$  SD. Two-tailed independent Student's  
443 t-tests were performed for comparison of two groups of data (SPSS v.23, IBM Corp., Armonk,  
444 NY, USA). For the analysis of three groups or more, one-way ANOVA was used (SPSS v.23, IBM  
445 Corp., Armonk, NY, USA), and further significance analysis among groups was analyzed by Post  
446 Hoc Test (equal variances, Turkey-HSD; unequal variances, Games-Howell). Kaplan-Meier  
447 method was used to calculate survival curves of leukemia, and Log-rank (Mantel-Cox) test was  
448 performed to compare differential significance in survival rates. P values of less than 0.05 were  
449 considered statistically significant (\*p < 0.05, \*\*p < 0.01, \*\*\*p < 0.001).

450 **Data availability:** The data that support the findings of this study are available from the  
451 corresponding author upon reasonable request.

452 **References**

- 453 1 Kfoury, Y. & Scadden, D. T. Mesenchymal cell contributions to the stem cell niche. *Cell*  
454 *Stem Cell* **16**, 239-253, doi:10.1016/j.stem.2015.02.019 (2015).
- 455 2 Raaijmakers, M. H. *et al.* Bone progenitor dysfunction induces myelodysplasia and  
456 secondary leukaemia. *Nature* **464**, 852-857, doi:10.1038/nature08851 (2010).
- 457 3 Schepers, K. *et al.* Myeloproliferative neoplasia remodels the endosteal bone marrow niche  
458 into a self-reinforcing leukemic niche. *Cell Stem Cell* **13**, 285-299,  
459 doi:10.1016/j.stem.2013.06.009 (2013).
- 460 4 Bowers, M. *et al.* Osteoblast ablation reduces normal long-term hematopoietic stem cell  
461 self-renewal but accelerates leukemia development. *Blood* **125**, 2678-2688,  
462 doi:10.1182/blood-2014-06-582924 (2015).
- 463 5 Dong, L. *et al.* Leukaemogenic effects of Ptpn11 activating mutations in the stem cell  
464 microenvironment. *Nature* **539**, 304-308, doi:10.1038/nature20131 (2016).
- 465 6 Blau, O. *et al.* Mesenchymal stromal cells of myelodysplastic syndrome and acute myeloid  
466 leukemia patients have distinct genetic abnormalities compared with leukemic blasts.  
467 *Blood* **118**, 5583-5592, doi:10.1182/blood-2011-03-343467 (2011).
- 468 7 Pandis, N. *et al.* Complex chromosome rearrangements involving 12q14 in two uterine  
469 leiomyomas. *Cancer Genet Cytogenet* **49**, 51-56 (1990).
- 470 8 Medyouf, H. *et al.* Myelodysplastic cells in patients reprogram mesenchymal stromal cells  
471 to establish a transplantable stem cell niche disease unit. *Cell Stem Cell* **14**, 824-837,  
472 doi:10.1016/j.stem.2014.02.014 (2014).
- 473 9 Ren, G. *et al.* Mesenchymal stem cell-mediated immunosuppression occurs via concerted  
474 action of chemokines and nitric oxide. *Cell Stem Cell* **2**, 141-150,  
475 doi:10.1016/j.stem.2007.11.014 (2008).

- 476 10 Prockop, D. J. Inflammation, fibrosis, and modulation of the process by mesenchymal  
477 stem/stromal cells. *Matrix Biol* **51**, 7-13, doi:10.1016/j.matbio.2016.01.010 (2016).
- 478 11 Shi, Y. *et al.* Immunoregulatory mechanisms of mesenchymal stem and stromal cells in  
479 inflammatory diseases. *Nat Rev Nephrol* **14**, 493-507, doi:10.1038/s41581-018-0023-5  
480 (2018).
- 481 12 Le Blanc, K. & Mougiakakos, D. Multipotent mesenchymal stromal cells and the innate  
482 immune system. *Nat Rev Immunol* **12**, 383-396, doi:10.1038/nri3209 (2012).
- 483 13 Mittal, M. *et al.* TNFalpha-stimulated gene-6 (TSG6) activates macrophage phenotype  
484 transition to prevent inflammatory lung injury. *Proc Natl Acad Sci U S A* **113**, E8151-  
485 E8158, doi:10.1073/pnas.1614935113 (2016).
- 486 14 Wang, G. *et al.* Kynurenic acid, an IDO metabolite, controls TSG-6-mediated  
487 immunosuppression of human mesenchymal stem cells. *Cell Death Differ* **25**, 1209-1223,  
488 doi:10.1038/s41418-017-0006-2 (2018).
- 489 15 Du, L. *et al.* IGF-2 Preprograms Maturing Macrophages to Acquire Oxidative  
490 Phosphorylation-Dependent Anti-inflammatory Properties. *Cell Metab*,  
491 doi:10.1016/j.cmet.2019.01.006 (2019).
- 492 16 Eggenhofer, E. *et al.* Mesenchymal stem cells are short-lived and do not migrate beyond  
493 the lungs after intravenous infusion. *Front Immunol* **3**, 297,  
494 doi:10.3389/fimmu.2012.00297 (2012).
- 495 17 Ehninger, A. & Trumpp, A. The bone marrow stem cell niche grows up: mesenchymal  
496 stem cells and macrophages move in. *J Exp Med* **208**, 421-428, doi:10.1084/jem.20110132  
497 (2011).

- 498 18 Chen, J. *et al.* CCL18 from tumor-associated macrophages promotes breast cancer  
499 metastasis via PITPNM3. *Cancer Cell* **19**, 541-555, doi:10.1016/j.ccr.2011.02.006 (2011).
- 500 19 Gubin, M. M. *et al.* High-Dimensional Analysis Delineates Myeloid and Lymphoid  
501 Compartment Remodeling during Successful Immune-Checkpoint Cancer Therapy. *Cell*  
502 **175**, 1014-1030 e1019, doi:10.1016/j.cell.2018.09.030 (2018).
- 503 20 Chen, C. C. *et al.* Organ-level quorum sensing directs regeneration in hair stem cell  
504 populations. *Cell* **161**, 277-290, doi:10.1016/j.cell.2015.02.016 (2015).
- 505 21 Liu, C. *et al.* Macrophages Mediate the Repair of Brain Vascular Rupture through Direct  
506 Physical Adhesion and Mechanical Traction. *Immunity* **44**, 1162-1176,  
507 doi:10.1016/j.immuni.2016.03.008 (2016).
- 508 22 Winkler, I. G. *et al.* Bone marrow macrophages maintain hematopoietic stem cell (HSC)  
509 niches and their depletion mobilizes HSCs. *Blood* **116**, 4815-4828, doi:10.1182/blood-  
510 2009-11-253534 (2010).
- 511 23 Bosurgi, L. *et al.* Macrophage function in tissue repair and remodeling requires IL-4 or IL-  
512 13 with apoptotic cells. *Science* **356**, 1072-1076, doi:10.1126/science.aai8132 (2017).
- 513 24 Cho, D. I. *et al.* Mesenchymal stem cells reciprocally regulate the M1/M2 balance in mouse  
514 bone marrow-derived macrophages. *Exp Mol Med* **46**, e70, doi:10.1038/emm.2013.135  
515 (2014).
- 516 25 Nemeth, K. *et al.* Bone marrow stromal cells attenuate sepsis via prostaglandin E(2)-  
517 dependent reprogramming of host macrophages to increase their interleukin-10 production.  
518 *Nat Med* **15**, 42-49, doi:10.1038/nm.1905 (2009).



- 519 26 Wang, J. *et al.* Endogenous oncogenic Nras mutation promotes aberrant GM-CSF signaling  
520 in granulocytic/monocytic precursors in a murine model of chronic myelomonocytic  
521 leukemia. *Blood* **116**, 5991-6002, doi:10.1182/blood-2010-04-281527 (2010).
- 522 27 Wang, J. *et al.* Endogenous oncogenic Nras mutation initiates hematopoietic malignancies  
523 in a dose- and cell type-dependent manner. *Blood* **118**, 368-379, doi:10.1182/blood-2010-  
524 12-326058 (2011).
- 525 28 Wang, J. Y. *et al.* Nras(G12D/+) promotes leukemogenesis by aberrantly regulating  
526 hematopoietic stem cell functions. *Blood* **121**, 5203-5207, doi:10.1182/blood-2012-12-  
527 475863 (2013).
- 528 29 Freeman, B. T., Jung, J. P. & Ogle, B. M. Single-Cell RNA-Seq of Bone Marrow-Derived  
529 Mesenchymal Stem Cells Reveals Unique Profiles of Lineage Priming. *PLoS One* **10**,  
530 e0136199, doi:10.1371/journal.pone.0136199 (2015).
- 531 30 Song, L., Webb, N. E., Song, Y. & Tuan, R. S. Identification and functional analysis of  
532 candidate genes regulating mesenchymal stem cell self-renewal and multipotency. *Stem*  
533 *Cells* **24**, 1707-1718, doi:10.1634/stemcells.2005-0604 (2006).
- 534 31 Rostovskaya, M. & Anastassiadis, K. Differential expression of surface markers in mouse  
535 bone marrow mesenchymal stromal cell subpopulations with distinct lineage commitment.  
536 *PLoS One* **7**, e51221, doi:10.1371/journal.pone.0051221 (2012).
- 537 32 Delorme, B. *et al.* Specific lineage-priming of bone marrow mesenchymal stem cells  
538 provides the molecular framework for their plasticity. *Stem Cells* **27**, 1142-1151,  
539 doi:10.1002/stem.34 (2009).

- 540 33 Gneccchi, M., Danieli, P., Malpasso, G. & Ciuffreda, M. C. Paracrine Mechanisms of  
541 Mesenchymal Stem Cells in Tissue Repair. *Methods Mol Biol* **1416**, 123-146,  
542 doi:10.1007/978-1-4939-3584-0\_7 (2016).
- 543 34 Gallucci, R. M. *et al.* Impaired cutaneous wound healing in interleukin-6-deficient and  
544 immunosuppressed mice. *FASEB J* **14**, 2525-2531, doi:10.1096/fj.00-0073com (2000).
- 545 35 Castela, M. *et al.* Ccl2/Ccr2 signalling recruits a distinct fetal microchimeric population  
546 that rescues delayed maternal wound healing. *Nat Commun* **8**, 15463,  
547 doi:10.1038/ncomms15463 (2017).
- 548 36 Kato, T. *et al.* SDF-1 improves wound healing ability of glucocorticoid-treated adipose  
549 tissue-derived mesenchymal stem cells. *Biochem Biophys Res Commun* **493**, 1010-1017,  
550 doi:10.1016/j.bbrc.2017.09.100 (2017).
- 551 37 Hayashi, Y. *et al.* CXCL14 and MCP1 are potent trophic factors associated with cell  
552 migration and angiogenesis leading to higher regenerative potential of dental pulp side  
553 population cells. *Stem Cell Res Ther* **6**, 111, doi:10.1186/s13287-015-0088-z (2015).
- 554 38 Sims, N. A. *et al.* Interleukin-11 receptor signaling is required for normal bone remodeling.  
555 *J Bone Miner Res* **20**, 1093-1102, doi:10.1359/JBMR.050209 (2005).
- 556 39 Schenk, S. *et al.* Monocyte chemotactic protein-3 is a myocardial mesenchymal stem cell  
557 homing factor. *Stem Cells* **25**, 245-251, doi:10.1634/stemcells.2006-0293 (2007).
- 558 40 Kleppe, M. *et al.* JAK-STAT pathway activation in malignant and nonmalignant cells  
559 contributes to MPN pathogenesis and therapeutic response. *Cancer Discov* **5**, 316-331,  
560 doi:10.1158/2159-8290.CD-14-0736 (2015).
- 561 41 Pang, L., Weiss, M. J. & Poncz, M. Megakaryocyte biology and related disorders. *J Clin*  
562 *Invest* **115**, 3332-3338, doi:10.1172/JCI26720 (2005).

- 563 42 Zhu, H. *et al.* A protocol for isolation and culture of mesenchymal stem cells from mouse  
564 compact bone. *Nat Protoc* **5**, 550-560, doi:10.1038/nprot.2009.238 (2010).
- 565 43 Rombouts, W. J. & Ploemacher, R. E. Primary murine MSC show highly efficient homing  
566 to the bone marrow but lose homing ability following culture. *Leukemia* **17**, 160-170,  
567 doi:10.1038/sj.leu.2402763 (2003).
- 568 44 Padron, E. *et al.* GM-CSF-dependent pSTAT5 sensitivity is a feature with therapeutic  
569 potential in chronic myelomonocytic leukemia. *Blood* **121**, 5068-5077, doi:10.1182/blood-  
570 2012-10-460170 (2013).
- 571 45 Kaser, A. *et al.* Interleukin-6 stimulates thrombopoiesis through thrombopoietin: role in  
572 inflammatory thrombocytosis. *Blood* **98**, 2720-2725 (2001).
- 573 46 Medina, R. J. *et al.* Myeloid angiogenic cells act as alternative M2 macrophages and  
574 modulate angiogenesis through interleukin-8. *Mol Med* **17**, 1045-1055,  
575 doi:10.2119/molmed.2011.00129 (2011).
- 576 47 Ohnishi, H. *et al.* Ectodomain shedding of SHPS-1 and its role in regulation of cell  
577 migration. *J Biol Chem* **279**, 27878-27887, doi:10.1074/jbc.M313085200 (2004).
- 578 48 Hocking, A. M. The Role of Chemokines in Mesenchymal Stem Cell Homing to Wounds.  
579 *Adv Wound Care (New Rochelle)* **4**, 623-630, doi:10.1089/wound.2014.0579 (2015).
- 580 49 Wynn, T. A. & Vannella, K. M. Macrophages in Tissue Repair, Regeneration, and Fibrosis.  
581 *Immunity* **44**, 450-462, doi:10.1016/j.immuni.2016.02.015 (2016).
- 582 50 Maurer, M. & von Stebut, E. Macrophage inflammatory protein-1. *Int J Biochem Cell Biol*  
583 **36**, 1882-1886, doi:10.1016/j.biocel.2003.10.019 (2004).

- 584 51 Pricola, K. L., Kuhn, N. Z., Haleem-Smith, H., Song, Y. & Tuan, R. S. Interleukin-6  
585 maintains bone marrow-derived mesenchymal stem cell stemness by an ERK1/2-  
586 dependent mechanism. *J Cell Biochem* **108**, 577-588, doi:10.1002/jcb.22289 (2009).
- 587 52 Liu, C. *et al.* Macrophages Mediate the Repair of Brain Vascular Rupture through Direct  
588 Physical Adhesion and Mechanical Traction. *Immunity* **44**, 1162-1176,  
589 doi:10.1016/j.immuni.2016.03.008 (2016).
- 590 53 Hanoun, M. *et al.* Acute myelogenous leukemia-induced sympathetic neuropathy promotes  
591 malignancy in an altered hematopoietic stem cell niche. *Cell Stem Cell* **15**, 365-375,  
592 doi:10.1016/j.stem.2014.06.020 (2014).
- 593 54 Cheng, H. *et al.* Leukemic marrow infiltration reveals a novel role for Egr3 as a potent  
594 inhibitor of normal hematopoietic stem cell proliferation. *Blood* **126**, 1302-1313,  
595 doi:10.1182/blood-2015-01-623645 (2015).
- 596 55 Tang, F. *et al.* RNA-Seq analysis to capture the transcriptome landscape of a single cell.  
597 *Nat Protoc* **5**, 516-535, doi:10.1038/nprot.2009.236 (2010).
- 598 56 Kim, D., Langmead, B. & Salzberg, S. L. HISAT: a fast spliced aligner with low memory  
599 requirements. *Nat Methods* **12**, 357-360, doi:10.1038/nmeth.3317 (2015).
- 600 57 Liao, Y., Smyth, G. K. & Shi, W. featureCounts: an efficient general purpose program for  
601 assigning sequence reads to genomic features. *Bioinformatics* **30**, 923-930,  
602 doi:10.1093/bioinformatics/btt656 (2014).
- 603 58 Love, M. I., Huber, W. & Anders, S. Moderated estimation of fold change and dispersion  
604 for RNA-seq data with DESeq2. *Genome Biol* **15**, 550, doi:10.1186/s13059-014-0550-8  
605 (2014).

- 606 59 Subramanian, A. *et al.* Gene set enrichment analysis: a knowledge-based approach for  
607 interpreting genome-wide expression profiles. *Proc Natl Acad Sci U S A* **102**, 15545-  
608 15550, doi:10.1073/pnas.0506580102 (2005).
- 609 60 Yu, G., Wang, L. G., Han, Y. & He, Q. Y. clusterProfiler: an R package for comparing  
610 biological themes among gene clusters. *OMICS* **16**, 284-287, doi:10.1089/omi.2011.0118  
611 (2012).
- 612 61 Arango Duque, G. & Descoteaux, A. Macrophage cytokines: involvement in immunity and  
613 infectious diseases. *Front Immunol* **5**, 491, doi:10.3389/fimmu.2014.00491 (2014).
- 614 62 Cavillon, J. M. Cytokines and macrophages. *Biomed Pharmacother* **48**, 445-453 (1994).  
615

616 **Acknowledgments**

617 This work was supported by grants from the Strategic Priority Research Program of Chinese  
618 Academy of Sciences (XDA16010208), the Chinese Ministry of Science and Technology  
619 (2015CB964401, 2016YFA0100601, 2017YFA0103401, and 2015CB964902), the CAS Key  
620 Research Program of Frontier Sciences (QYZDB-SSW-SMC057), the Major Research and  
621 Development Project of Guangzhou Regenerative Medicine and Health Guangdong Laboratory  
622 (2018GZR110104006), the Health and Medical Care Collaborative Innovation Program of  
623 Guangzhou Scientific and Technology (201803040017), CAMS Innovation Fund for Medical  
624 Sciences (2016-12M-1-002), the Major Scientific and Technological Project of Guangdong  
625 Province (2014B020225005), co-operation Program from Guangdong Natural Science Foundation  
626 (2014A030312012), the General Program from Guangzhou Scientific and Technological Project  
627 (201707010157), the Science and Technology Planning Project of Guangdong Province  
628 (2017B030314056), the Program for Guangdong Introducing Innovative and Entrepreneurial  
629 Teams (2017ZT07S347), the grants from the National Natural Science Foundation of China (Grant  
630 No 314711117, 31271457, 81470281, 81421002, 81730006, and 3150094), the grants from the  
631 Ministry of Science and Technology of China (2016YFA0100600), and grants from NIH, USA  
632 (AI079087, D.W. and HL130724 D.W.)

633 **Author Contributions**

634 C.X.X. performed research, analyzed data and wrote the manuscript; D.Y. and Q.T.W. analyzed  
635 RNA-Seq data; T.J.W., H.C., P.Q.Z., K.T.W., X.F.L., Y.G., S.H.M., L.X. and Y.X.G. performed  
636 experiments; S.H., J.D., X.D., Y.Q.L., X.F.Z., Y.F.S. and S.X. discussed the manuscript; D.W.  
637 discussed the project and wrote the manuscript. T.C. and J.Y.W. designed the research and wrote  
638 the manuscript.

639 **Competing interest:** The authors declare no competing interests.

640 **Figures and figure legends**

**Fig. 1**

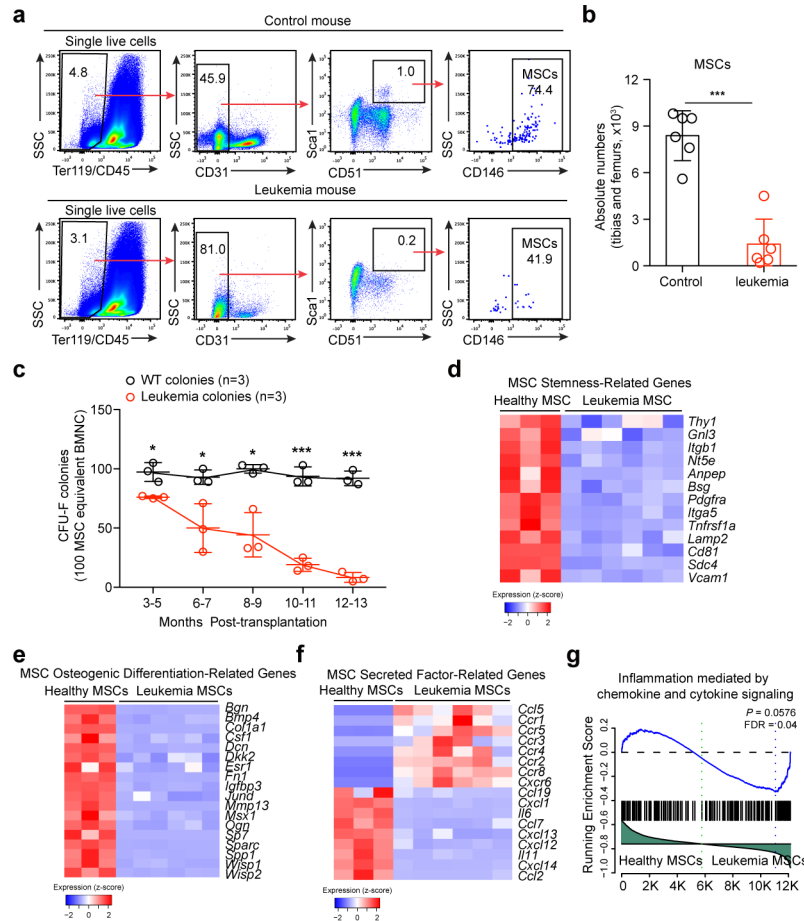

641

642 **Fig.1 Impaired BM MSCs in mice with NrasG12D mutation-induced leukemia**

643 CD45.2<sup>+</sup> BMNC from LSL *Nras*<sup>+/+</sup>; *Vav-Cre* mice (NV mice) were sorted and transplanted into  
644 sublethally irradiated (6.5 Gy) individual recipients (CD45.1 strain) with a cell dose of 0.3 million  
645 per recipient. For control recipient mice (CD45.1 strain), 0.3 million sorted CD45.2<sup>+</sup> BMNC from  
646 WT mice were transplanted. **(a)** Gating strategies for BM MSCs. MSCs were defined as Ter119<sup>-</sup>  
647 CD45<sup>-</sup>CD31<sup>-</sup>Sca1<sup>+</sup>CD51<sup>+</sup>CD146<sup>+</sup>. Plots from one representative control mouse (CD11b<sup>+</sup>% in PB  
648 = 10%) and one leukemia-bearing mouse (CD11b<sup>+</sup>% in PB > 60%) of six mice of each group were  
649 shown. The nucleated cell mixtures of BM and compact bones were prepared for flow cytometry  
650 analysis of MSCs. **(b)** Statistical analysis of the absolute numbers of MSCs in tibias and femurs



651 from control and leukemia-bearing mice. \*\*\* $p < 0.001$ . Unpaired Student's t-test (two-tailed).  
652 Data are represented as mean  $\pm$  SD (n = 6 mice for each group). **(c)** Kinetic analysis of functional  
653 MSCs in CFU-F assay. Total BMNC equivalent to 100 MSCs calculated by the percentages of  
654 MSCs in individual BMNC samples by flow cytometry analysis. For each time point, BMNC of  
655 three mice in each group were analyzed. \* $p < 0.05$ , \*\*\* $p < 0.001$ . Unpaired Student's t-test (two-  
656 tailed). Data are represented as mean  $\pm$  SD. **(d)** Heatmaps of MSC stemness-related genes  
657 differentially expressed between healthy MSCs and MSCs from leukemia-bearing mice ( $\text{padj} <$   
658  $0.05$ , fold change  $> 1.6$ ). One thousand sorted MSCs ( $\text{Ter119}^- \text{CD45}^- \text{CD31}^- \text{Sca1}^+ \text{CD51}^+$ ) from the  
659 nucleated cell mixtures of BM and compact bones of leukemia-bearing mice and control mice were  
660 used as each cell sample input for RNA-Seq. Leukemia-bearing mice ( $\text{CD11b}^+$ % in PB = 35%-  
661 45%) and control mice ( $\text{CD11b}^+$ % in PB = 10-15%). The expression value (DESeq2 normalized  
662 counts) of each gene was converted to z-score values (red, high; blue, low), and the heatmaps were  
663 plotted by gplots (heatmap.2). Columns represent the indicated cell subsets in nine MSC samples  
664 (Healthy MSCs from control mice: n = 3, MSCs from leukemia-bearing mice: n = 6). **(e)** Heatmaps  
665 of osteogenic differentiation-related genes differentially expressed between healthy MSCs and  
666 MSCs from leukemia-bearing mice ( $\text{padj} < 0.05$ , fold change  $> 2$ ). The expression value (DESeq2  
667 normalized counts) of each gene was converted to z-score values (red, high; blue, low), and the  
668 heatmaps were plotted by gplots (heatmap.2). Columns represent the indicated cell subsets in nine  
669 MSC samples (Healthy MSCs: n = 3, MSCs from leukemia-bearing mice: n = 6). **(f)** Heatmaps of  
670 MSC secreted factor-related genes differentially expressed between healthy MSCs and MSCs from  
671 leukemia-bearing mice ( $\text{padj} < 0.05$ , fold change  $> 2$ ). The expression value (DESeq2 normalized  
672 counts) of each gene was converted to z-score values (red, high; blue, low), and the heatmaps were  
673 plotted by gplots (heatmap.2). Columns represent the indicated cell subsets in nine MSC samples

674 (Healthy MSCs: n = 3, MSCs from leukemia-bearing mice: n = 6). **(g)** GSEA of the inflammation  
675 mediated by chemokine and cytokine signaling in healthy MSCs and MSCs from leukemia-bearing  
676 mice. DESeq2 normalized values of the expression data were used for GSEA analysis.

**Fig. 2**

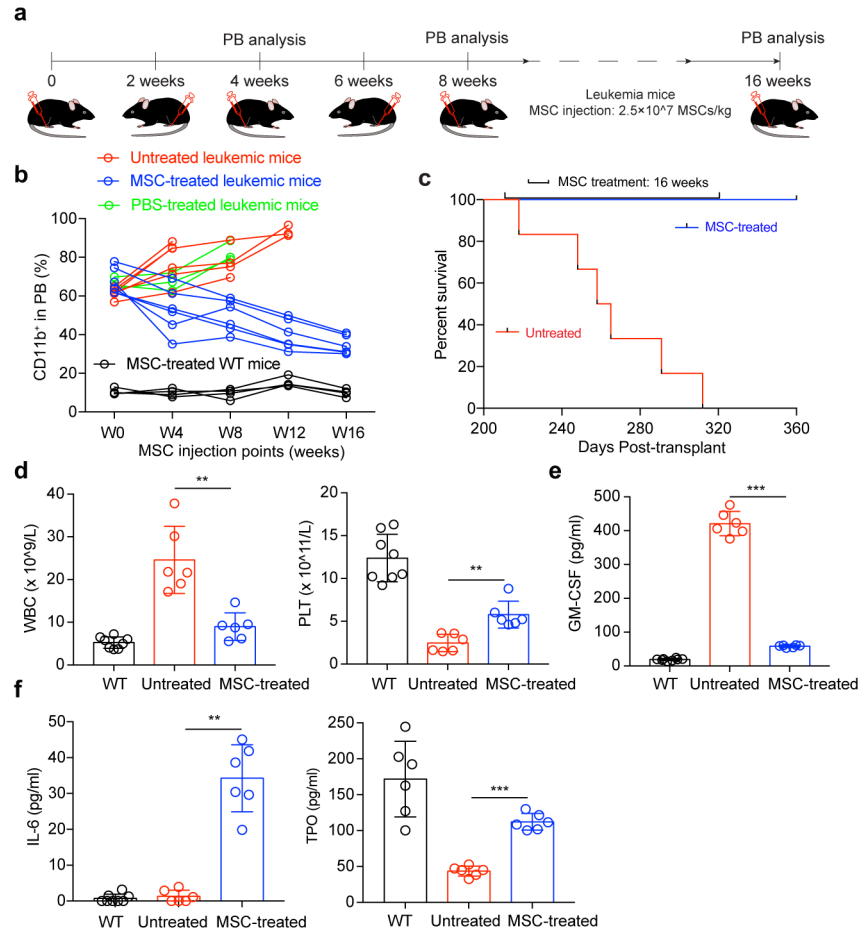

677

678 **Fig.2 Intra-BM transfusion of donor MSCs prolongs survival of leukemia-bearing mice**

679 **(a)** Schematic diagram of MSC transfusion strategy. The donor MSCs prepared for transfusion

680 were isolated from the compact bone and BMNC of three to four-week-old healthy GFP mice. The

681 isolated MSCs were expanded *in vitro*, and the secondary passage products were used for

682 transfusion. Leukemia-bearing mice with severe tumor burden (CD11b<sup>+</sup>% in PB > 60%) were

683 treated by intra-bone-marrow transfusion of donor MSCs. WT mice were treated by the same

684 procedure as treatment control, and leukemia-bearing mice without MSC treatment were used as

685 untreated controls. A dose of  $2.5 \times 10^7$  MSCs/kg in 20  $\mu$ l DPBS were delivered into the tibia

686 cavity using 29-gauge needle. Every tibia was treated once per month by switching the injection

687 site every other dose. **(b)** Kinetic analysis of tumor burden (CD11b<sup>+</sup>) of MSC-treated leukemia-

688 bearing mice. The time window of MSC treatment is from 0 weeks (W0, treatment starting time)  
689 to 16 weeks (W16). Flow cytometry analysis of tumor burden (CD11b<sup>+</sup>) in PB was performed  
690 monthly. Untreated leukemia-bearing mice were used as disease control (red line), PBS-treated  
691 leukemia-bearing mice were used as injected control (green line), and MSC-treated WT mice were  
692 used as treatment control (black line). Untreated leukemia-bearing mice: n = 6; PBS-treated  
693 leukemia-bearing mice: n = 3; MSC-treated leukemia-bearing mice (blue line): n = 6; MSC-treated  
694 WT mice: n = 4. **(c)** Kaplan-Meier survival of MSC-treated leukemia-bearing mice. Kaplan-Meier  
695 survival curves of untreated (n = 6, Median survival = 261.5 days) and MSC-treated (n = 6, Median  
696 survival = 360 days) leukemia-bearing mice were shown. The untreated leukemia-bearing mice  
697 from the same batch were used as control (red line). Log-rank (Mantel-Cox) test:  $p < 0.001$ . **(d)**  
698 Statistical analysis of white blood cells (WBC) and platelets (PLT) counts in PB of WT mice,  
699 untreated leukemia-bearing mice, and MSC-treated leukemia-bearing mice at week nine since the  
700 MSC treatment.  $**p < 0.01$ . One-way ANOVA test. Data are represented as mean  $\pm$  SD (n =6-8  
701 mice for each group). **(e)** ELISA of GM-CSF levels in PB serum. Serum prepared from 200  $\mu$ L  
702 PB of individual WT mice (n=8 ), untreated leukemia-bearing mice (Untreated, n=6) and MSC-  
703 treated leukemia-bearing mice (MSC-treated, n=6) eight weeks post MSC treatment.  $***p < 0.001$ .  
704 One-way ANOVA test. Data are represented as mean  $\pm$  SD. **(f)** ELISA of IL-6 and TPO levels in  
705 PB serum. Serum prepared from 200  $\mu$ L PB of individual WT mice (n=8 ), untreated leukemia-  
706 bearing mice (Untreated, n=6) and MSC-treated leukemia-bearing mice (MSC-treated, n=6) eight  
707 weeks post MSC treatment.  $**p < 0.01$ ,  $***p < 0.001$ . One-way ANOVA test. Data are  
708 represented as mean  $\pm$  SD.

**Fig. 3**

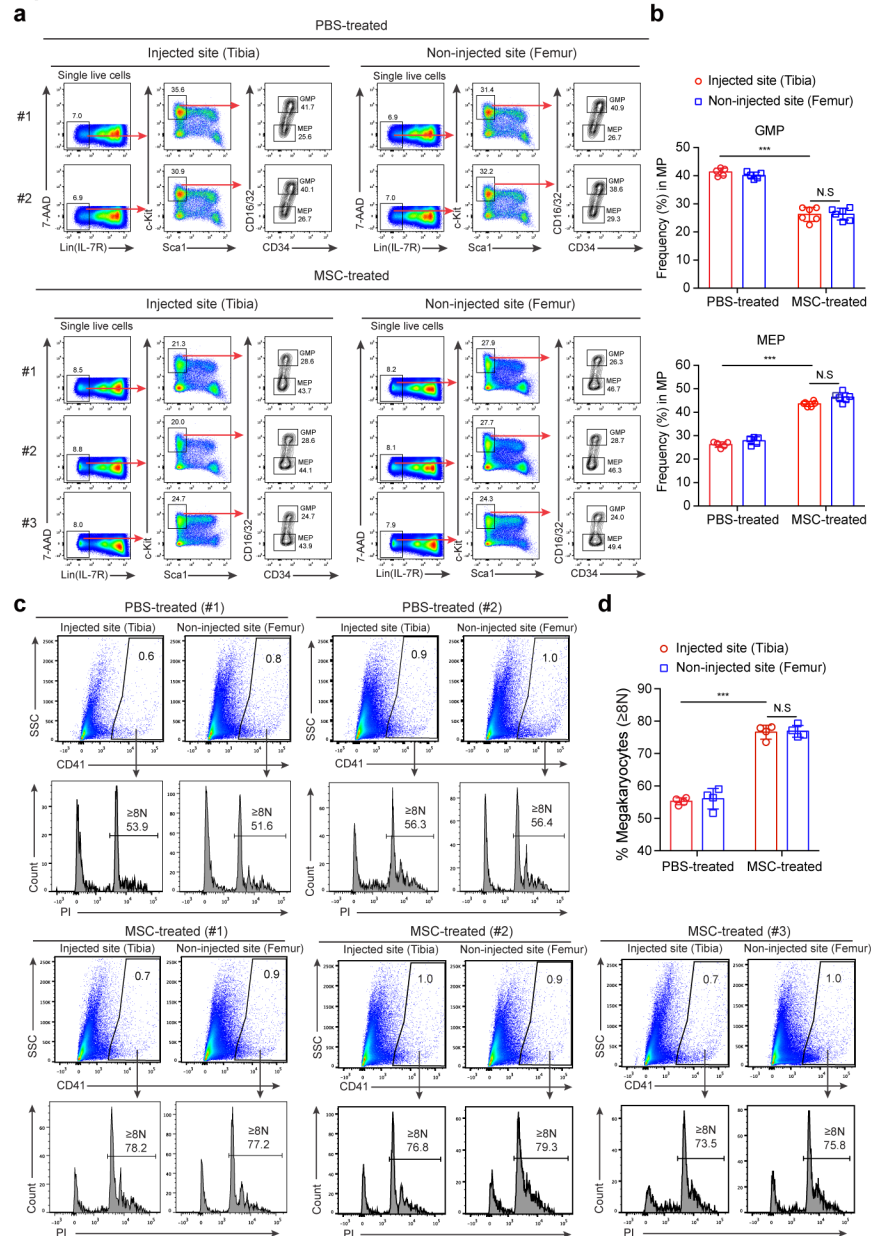

709

710 **Fig.3 Systemically re-balanced myeloid lineage progenitor cells and systemically activated**

711 **megakaryocytes in MSC-treated leukemia-bearing mice**

712 **(a) Ratios of myeloid progenitor subpopulations in MSC- and PBS-treated leukemia-bearing mice.**

713 Total bone marrow nucleated cells from the MSC-injected site (tibia) and non-injected site (femur)

714 of each leukemia-bearing mouse (n=3), and PBS-injected site (tibia) and non-injected site (femur)

715 of each leukemia-bearing mouse (n=2) four weeks post MSC/PBS treatment. GMP

716 (granulocyte/macrophage progenitors): Lin<sup>-</sup>IL-7R<sup>-</sup>Sca1<sup>-</sup>c-Kit<sup>+</sup>CD34<sup>+</sup>CD16/32<sup>high</sup>; MEP  
717 (megakaryocyte/erythroid progenitors): Lin<sup>-</sup>IL-7R<sup>-</sup>Sca1<sup>-</sup>c-Kit<sup>+</sup>CD34<sup>-</sup>CD16/32<sup>-</sup>. **(b)** Statistical  
718 analysis of myeloid progenitor components (GMP and MEP) in the injected site (tibia) and non-  
719 injected site (femur) of each PBS-treated leukemia-bearing mouse and MSC-treated leukemia-  
720 bearing mouse four weeks post-MSD treatment. \*\*\*p < 0.001. One-way ANOVA test. Data are  
721 represented as mean ± SD (n = 5-6 mice for each group). **(c)** Activation analysis of megakaryocytes  
722 in MSC- and PBS-treated leukemia-bearing mice. Plots from two representative PBS-treated  
723 leukemia-bearing mice and three representative MSC-treated leukemia-bearing mice four weeks  
724 post MSD treatment were shown. Percentages of mature megakaryocytes with 8N and greater  
725 ploidy (≥8N) were shown. **(d)** Statistical analysis of the percentages of mature megakaryocytes  
726 (≥8N). \*\*\*p < 0.001, N.S indicates non-significant. One-way ANOVA test. Data are represented  
727 as mean ± SD (n = 4 mice for each group).

**Fig. 4**

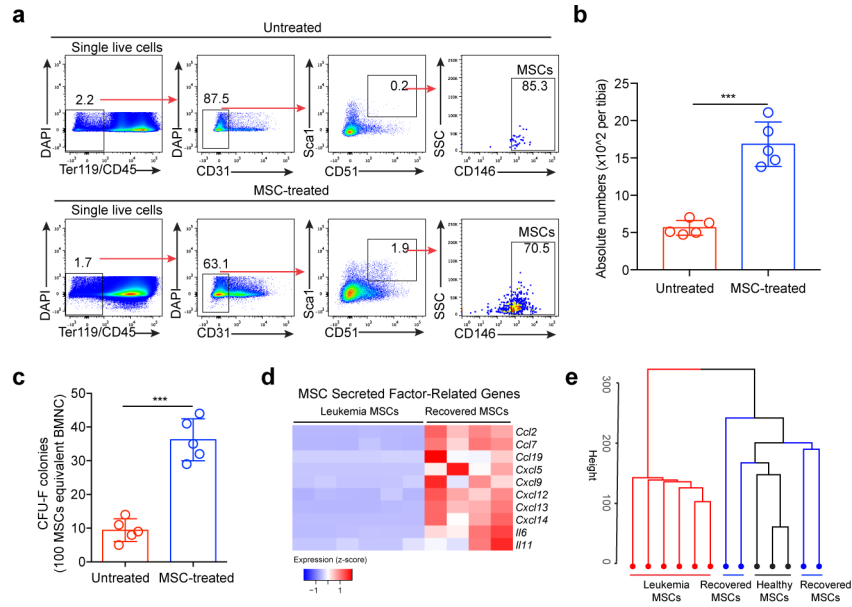

728

729 **Fig.4 Characterization of recovered host MSCs from MSC-treated leukemia-bearing mice**

730 **(a)** Flow cytometry analysis of recovered host MSCs in leukemia-bearing mice eight weeks post

731 MSC treatment. Tibias of MSC-treated leukemia-bearing mice eight weeks after the first dose  
732 MSC treatment were analyzed. Plots of one representative mouse from each group were shown.

733 MSCs were defined as Ter119<sup>-</sup>CD45<sup>-</sup>CD31<sup>-</sup>Sca1<sup>+</sup>CD51<sup>+</sup>CD146<sup>+</sup>. The nucleated cell mixtures of  
734 BM and compact bones were prepared for flow cytometry analysis of MSCs. **(b)** Statistical

735 analysis of the absolute numbers of host MSCs (GFP<sup>+</sup>, host-derived MSCs) in tibias from untreated  
736 and MSC-treated leukemia-bearing mice. \*\*\*p < 0.001. Unpaired Student's t-test (two-tailed).

737 Data are represented as mean ± SD (n = 5 mice for each group). **(c)** Statistical analysis of CFU-F  
738 colonies. The numbers of colonies of each group were counted after Giemsa staining. \*\*\*p <

739 0.001. Unpaired Student's t-test (two-tailed). Data are represented as mean ± SD (n = 5 mice for  
740 each group). **(d)** Heatmaps of MSC secreted factor-related genes differentially expressed between

741 MSCs from leukemia-bearing mice and recovered MSCs (padj < 0.05, fold change > 1.4). One  
742 thousand sorted MSCs (Ter119<sup>-</sup>CD45<sup>-</sup>CD31<sup>-</sup>Sca1<sup>+</sup>CD51<sup>+</sup>) from the nucleated cell mixtures of BM

743 and compact bones of leukemia-bearing mice and MSC-treated leukemia-bearing mice were used  
744 as each cell sample input for RNA-Seq. Recovered MSCs were isolated from tibias of MSC-treated  
745 leukemia-bearing mice eight weeks after the first dose MSC treatment. The expression value  
746 (DESeq2 normalized counts) of each gene was converted to z-score values (red, high; blue, low),  
747 and the heatmaps were plotted by gplots (heatmap.2). Columns represent the indicated cell subsets  
748 in ten MSC samples (MSCs from leukemia-bearing mice: n = 6, Recovered MSCs: n = 4). **(e)**  
749 Unsupervised hierarchical clustering of RNA-Seq data of MSCs from leukemia-bearing mice,  
750 healthy MSCs and recovered MSCs (GFP<sup>-</sup>, recipient-derived). For each RNA-Seq sample, one  
751 thousand MSCs from leukemia-bearing mice, healthy mice, and MSC-treated leukemia-bearing  
752 mice were sorted and analyzed (n = 3-6). The raw reads (fastq files) from RNA-Seq were aligned  
753 to mouse genome by Tophat2 package, and further normalized by Cufflinks. Unsupervised  
754 hierarchical clustering was conducted by factoextra R package.



**Fig. 5**

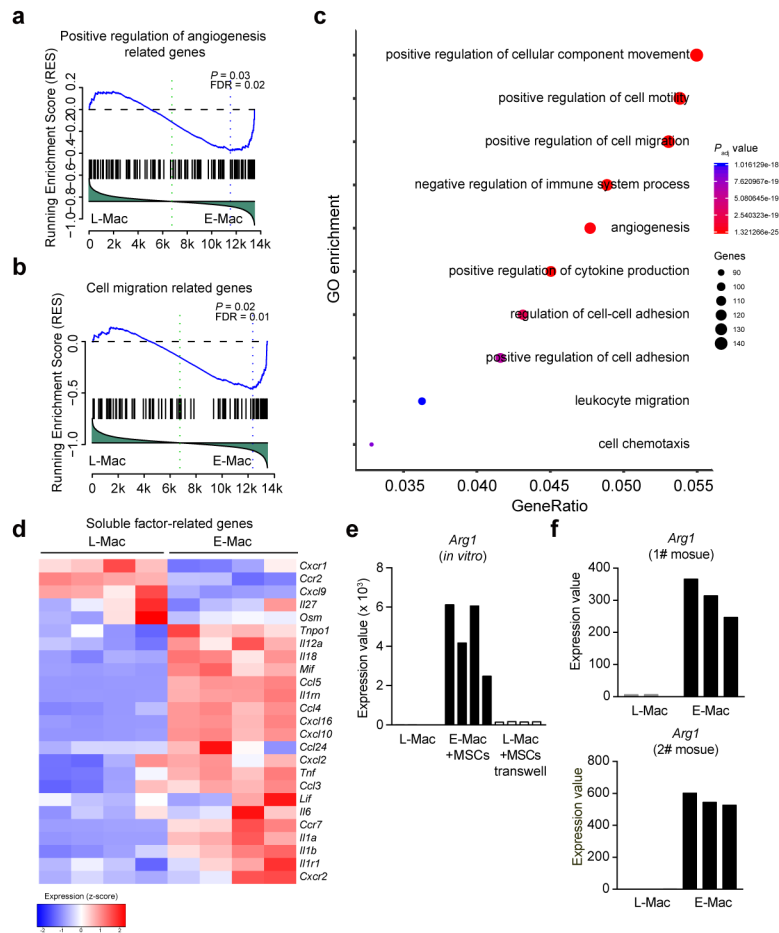

755

756 **Fig.5 Characterization of MSC-reprogrammed BM resident macrophages isolated from**  
757 **leukemia-bearing mice**

758 **(a)** Gene set enrichment analysis (GSEA) of the positive regulation of angiogenesis in L-Mac and  
759 E-Mac. L-Mac indicates leukemia macrophages. E-Mac indicates MSC-reprogrammed leukemia  
760 macrophages, which were co-cultured with MSCs *in vitro* for 12 h. DESeq2 normalized values of  
761 the expression data were used for GSEA analysis. **(b)** Gene set enrichment analysis (GSEA) of the  
762 cell migration related genes in L-Mac and E-Mac. DESeq2 normalized values of the expression  
763 data were used for GSEA analysis. **(c)** Gene ontology (GO)–enrichment analysis of the 3277  
764 differentially expressed genes between L-Mac and E-Mac: each symbol represents a GO term  
765 (noted in the plot); color indicates adjusted P value (padj (significance of the GO term)), and

766 symbol size is proportional to the number of genes. **(d)** Heatmaps of soluble factor-related genes  
767 in MSC-reprogrammed leukemia macrophages. The expression value (DESeq2 normalized  
768 counts) of each gene was converted to z-score value (red, high; blue, low). The heatmaps were  
769 plotted by gplots (heatmap.2). Columns represent the indicated macrophage sample replicates (L-  
770 Mac: n = 4 biological replicates; E-Mac: n = 4 biological replicates). **(e)** RNA-Seq analysis of  
771 *Arg1* in leukemia macrophages co-cultured with MSCs *in vitro*. L-Mac indicates leukemia  
772 macrophages. E-Mac (+MSCs) indicates MSC-reprogrammed leukemia macrophages, which were  
773 co-cultured with MSCs *in vitro* for 12 h. L-Mac (+MSCs transwell) indicates leukemia  
774 macrophages, which were transwell co-cultured with MSCs *in vitro* for 12 h. Y-axis indicates the  
775 expression value. The expression value (DESeq2 normalized counts) of each gene was illustrated  
776 by graphpad. Each column represents a replicate. **(f)** RNA-Seq analysis of *Arg1* in leukemia  
777 macrophages sorted from MSC-treated leukemia mice *in vivo*. Leukemia macrophages  
778 (CD11b<sup>+</sup>F4/80<sup>+</sup>) were sorted from the injected site (MSC-treated tibia) and non-injected site  
779 (untreated femur) of leukemia mice 12 h post-treatment. Y-axis indicates the expression value.  
780 The expression value (DESeq2 normalized counts) of each gene was illustrated by graphpad. Each  
781 column represents a replicate.

**Fig. 6**

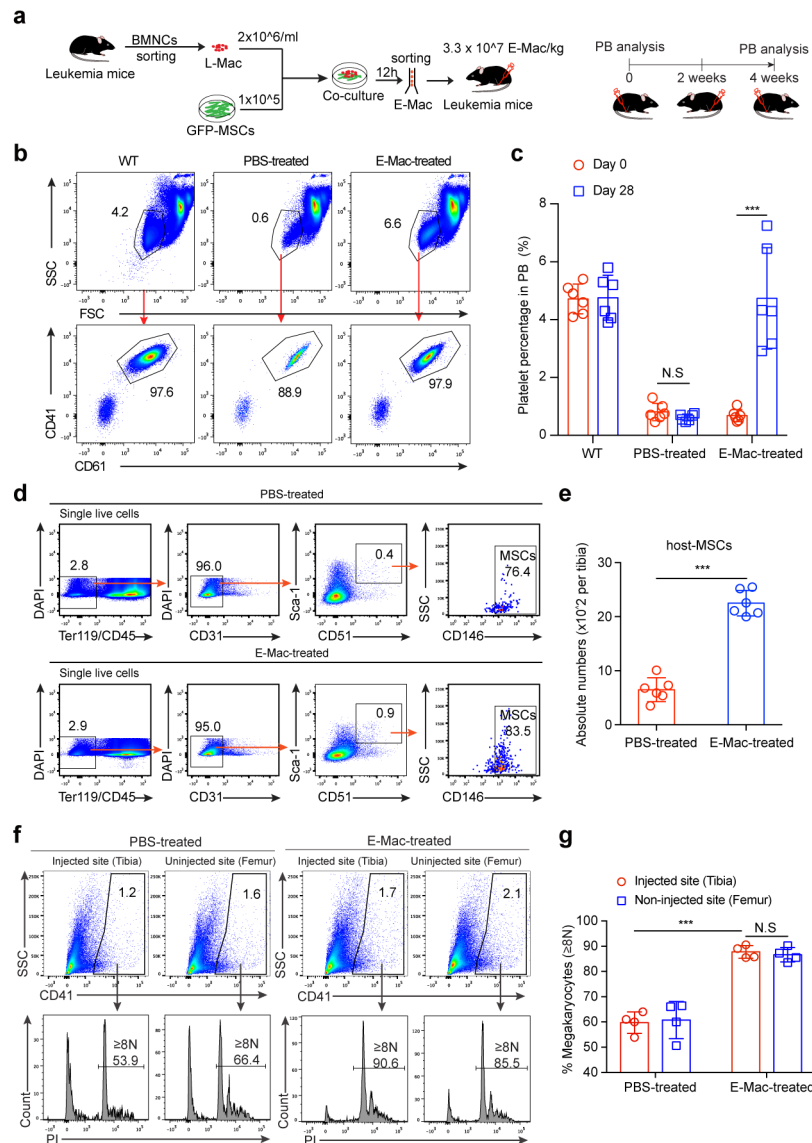

782

783 **Fig.6 Intra-bone-marrow transfusion of MSC-reprogrammed macrophages largely rescues**  
 784 **the therapeutic effects of MSC-treatment in leukemia mice**

785 **(a)** Schematic diagram of MSC-reprogrammed macrophages transfusion strategy.  $1 \times 10^5$  GFP<sup>+</sup>  
 786 MSCs were seeded into each well of six-well plate. CD11b<sup>+</sup> leukemia cells were enriched from  
 787 bone marrow of leukemia mice with severe tumor burden (CD11b<sup>+</sup>% in PB > 60%). Then  $2 \times 10^6$   
 788 CD11b<sup>+</sup> leukemia cells were directly co-cultured with MSCs. After 12 hours, leukemia  
 789 macrophages (CD11b<sup>+</sup>F4/80<sup>+</sup>) were sorted for transfusion. Leukemia mice with severe tumor

790 burden were treated by intra-bone-marrow transfusion of PBS or MSC-reprogrammed leukemia  
791 macrophages (E-Mac). A dose of  $3.3 \times 10^7$  E-Mac/kg in 20  $\mu$ l PBS were delivered into the tibia  
792 cavity using 29-gauge needle. Every tibia was treated once per two weeks by switching the  
793 injection site every other dose. Analysis of platelets and CD11b<sup>+</sup> cells in PB was performed  
794 monthly. **(b)** Representative dot plots of platelet populations and quantitative gating, as identified  
795 by CD41 and CD61 staining in PB of WT mice and PBS/E-Mac treated leukemia mice. After 4  
796 weeks of PBS/E-Mac treatment, PB of leukemia mice with PBS/E-Mac treatment was analyzed.  
797 **(c)** Statistical analysis of platelets in PB of leukemia-bearing mice treated with PBS or E-Mac.  
798 \*\*\*p < 0.01. N.S indicates non-significant. One-way ANOVA test. Data are represented as mean  
799  $\pm$  SD (n = 6 mice for each group). **(d)** Flow cytometry analysis of MSCs in leukemia-bearing mice  
800 post PBS/E-Mac treatment. Tibias of PBS/E-Mac treated leukemia mice at week five since the  
801 first dose of PBS/E-Mac treatment were analyzed. MSCs were defined as Ter119<sup>-</sup>CD45<sup>-</sup>CD31<sup>-</sup>  
802 Sca1<sup>+</sup>CD51<sup>+</sup>CD146<sup>+</sup>. The nucleated cell mixtures of BM and compact bones were prepared for  
803 flow cytometry analysis of MSCs. **(e)** Statistical analysis of the absolute numbers of host MSCs in  
804 tibias from PBS/E-Mac treated leukemia mice. \*\*\*p < 0.001. Unpaired Student's t-test (two-  
805 tailed). Data are represented as mean  $\pm$  SD (n = 6 mice for each group). **(f)** CD41<sup>+</sup> megakaryocytes  
806 from BM of MSC-injected site (tibia) and non-injected site (femur) were analyzed for DNA  
807 content. Plots from representative PBS-treated and E-Mac-treated leukemia mice four weeks post  
808 PBS/E-Mac treatment were shown. Percentages of mature megakaryocytes with 8N and greater  
809 ploidy ( $\geq 8N$ ) were shown. **(g)** Statistical analysis of the percentages of mature megakaryocytes  
810 ( $\geq 8N$ ) of CD41<sup>+</sup> BM megakaryocytes. \*\*\*p < 0.001. One-way ANOVA test. Data are represented  
811 as mean  $\pm$  SD (n = 4 mice for each group).

**Fig. 7**

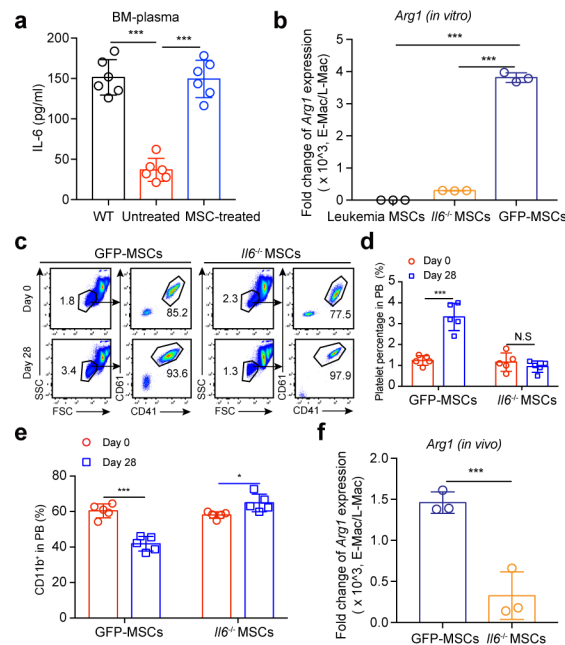

812

813 **Fig.7 *Il6*<sup>-/-</sup> MSCs neither reprogram macrophages from leukemia-bearing mice nor suppress**  
 814 **leukemia**

815 **(a)** ELISA of IL-6 levels in BM plasma. The BM plasma from WT mice, untreated leukemia-  
 816 bearing mice and MSC-treated leukemia-bearing mice eight weeks post MSC treatment were  
 817 analyzed. The BMNC of tibias and femurs were flushed out using 2 ml PBS, then the supernatants  
 818 of each sample were collected for ELISA. \*\*\*p < 0.001. One-way ANOVA test. Data are  
 819 represented as mean ± SD (n = 6 mice). **(b)** Q-PCR of *Arg1* expression levels in macrophages from  
 820 leukemia-bearing mice after co-culture with different sources of MSCs *in vitro*. Macrophages from  
 821 leukemia-bearing mice were co-cultured with MSCs from leukemia-bearing mice, *Il6*<sup>-/-</sup> MSCs or  
 822 GFP-MSCs *in vitro* for 12 h, separately. Then, one hundred thousand E-Mac (CD11b<sup>+</sup>F4/80<sup>+</sup>) were  
 823 sorted and were analyzed the expression of *Arg1*. Y-axis shows the fold changes of E-Mac/L-Mac  
 824 in each group. \*\*\*p < 0.001. One-way ANOVA test. Data are represented as mean ± SD (n = 3  
 825 repeats for each group). **(c)** Flow cytometry analysis of platelets in *Il6*<sup>-/-</sup> MSC-treated leukemia-  
 826 bearing mice. Representative dot plots of platelet populations and quantitative gating, as identified

827 by CD41 and CD61 staining in PB of GFP-MSC- or *Il6*<sup>-/-</sup> MSC-treated leukemia-bearing mice. PB  
828 of leukemia-bearing mice was analyzed at week-0 and week-4 post-treatment with GFP-MSCs or  
829 *Il6*<sup>-/-</sup> MSCs. **(d)** Statistical analysis of platelets (PLT) in PB of leukemia-bearing mice treated with  
830 GFP-MSCs or *Il6*<sup>-/-</sup> MSCs. \*\*\**p* < 0.01. N.S indicates not significant. One-way ANOVA test. Data  
831 are represented as mean ± SD (n = 5 mice for each group). **(e)** Statistical analysis of tumor burden  
832 (CD11b<sup>+</sup>) in PB of leukemia-bearing mice treated with GFP-MSCs or *Il6*<sup>-/-</sup> MSCs. \*\*\**p* < 0.01.  
833 N.S indicates non-significant. One-way ANOVA test. Data are represented as mean ± SD (n = 5  
834 mice for each group). **(f)** Q-PCR of *Arg1* expression levels in macrophages isolated from *Il6*<sup>-/-</sup>  
835 MSC-treated leukemia-bearing mice. One hundred thousand leukemia macrophages  
836 (CD11b<sup>+</sup>F4/80<sup>+</sup>) were sorted from the MSC-injected site (MSC-treated tibia) and non-injected site  
837 (femur) of leukemia-bearing mice 12h post-treatment. Y-axis shows the fold changes of E-Mac/L-  
838 Mac in each group. \*\*\**p* < 0.001. Unpaired Student's t-test (two-tailed). Data are represented as  
839 mean ± SD (n = 3 mice for each group).
